# Supplementary material
Source: Springer Nature journal article supplement (https://www.springermedizin.de/resource/supplementary/13054_2012_1703_MOESM4_ESM.pdf/9711306)

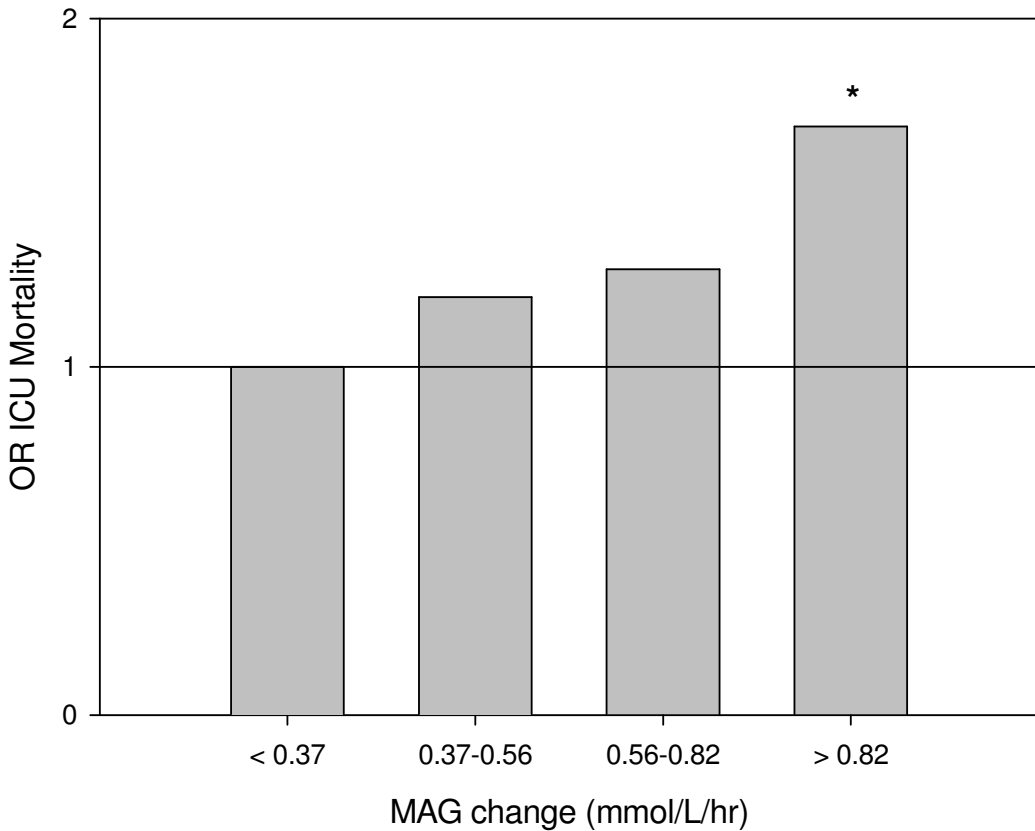

| MAG change (mmol/L/hr) | OR Mortality (95% CI) | <i>p</i> -value |
|------------------------|-----------------------|-----------------|
| < 0.37                 | Reference             | n.a.            |
| 0.37-0.56              | 1.20 (0.9-1.7)        | 0.29            |
| 0.56-0.82              | 1.28 (0.9-1.8)        | 0.13            |
| > 0.82                 | 1.69 (1.2-2.3)        | 0.001           |

*p* for trend = 0.004

Supplement: MOESM4 [file 9711306]
